# Supplementary material for: Association between probable postnatal depression and increased infant mortality and morbidity: findings from the DON population-based cohort study in rural Ghana
Source: HighWire-hosted journal article supplement (doi:10.1136/bmjopen-2014-006509), 2015-08-01
Supplement: bmjopen-2014-006509supp_tables.pdf [file bmjopen-2014-006509supp_tables.pdf]

| <b>Course of depression across perinatal period</b> | <b>*Number of infants (n)</b> | <b>Total infant months of follow up</b> | <b>Infant deaths</b> | <b>Incidence/1000 infant months</b> | <b>Crude Rate Ratio (95% CI)</b> | <b>‡Adjusted Rate Ratio (95% CI)</b> | <b>p-value</b> |
|-----------------------------------------------------|-------------------------------|-----------------------------------------|----------------------|-------------------------------------|----------------------------------|--------------------------------------|----------------|
| Not depressed at either assessment point            | 11162                         | 43959.0                                 | 78                   | 1.77                                | 1                                | 1                                    |                |
| Depressed at antenatal assessment only              | 1056                          | 4150.9                                  | 10                   | 2.41                                | 1.36 (0.70-2.62)                 | 1.32 (0.68-2.56)                     | 0.408          |
| Depressed at postnatal assessment only              | 262                           | 1069.9                                  | 9                    | 8.41                                | 4.74 (2.38-9.45)                 | 4.80 (2.39-9.63)                     | <0.001         |
| Depressed at both assessment points                 | 138                           | 534.1                                   | 3                    | 5.62                                | 3.16 (0.99-10.03)                | 3.19 (0.99-10.17)                    | 0.050          |
| <b>Total</b>                                        | <b>12618</b>                  | <b>49713.9</b>                          | <b>100</b>           |                                     |                                  |                                      |                |

\*Infants of mothers assessed both during pregnancy and postnatally.

‡ adjusted for: mother's age, education, marital status, wealth quintile, ethnicity, religion, area of residence, parity, early parturition, mode of delivery, perceived size of baby.

**Online table 1.1: Effect of probable Antenatal and/or Postnatal depression on Infant Mortality up to Twelve Months.**

| Course of depression across perinatal period                    | *Number of infants | Number of visits (n) | †% of visits | Crude Relative Risk (95% CI) | ‡Adjusted Relative Risk (95% CI) | p-value |
|-----------------------------------------------------------------|--------------------|----------------------|--------------|------------------------------|----------------------------------|---------|
| <b>Any ill health on day of visit</b>                           |                    |                      |              |                              |                                  |         |
| Not depressed at either assessment point                        | 11160              | 72332                | 11.1         | 1                            | 1                                |         |
| Depressed at antenatal assessment only                          | 1056               | 7120                 | 16.1         | 1.54 (1.39 - 1.68)           | 1.43 (1.30 - 1.55)               | <.001   |
| Depressed at postnatal assessment only                          | 262                | 1710                 | 18.1         | 1.78 (1.47 - 2.08)           | 1.63 (1.36 - 1.89)               | <.001   |
| Depressed at both assessment points                             | 138                | 909                  | 21.8         | 2.26 (1.77 - 2.75)           | 1.98 (1.57 - 2.38)               | <.001   |
| <b>Any serious illness in past month requiring care-seeking</b> |                    |                      |              |                              |                                  |         |
| Not depressed at either assessment point                        | 11160              | 72330                | 11.4         | 1                            | 1                                |         |
| Depressed at antenatal assessment only                          | 1056               | 7120                 | 14.1         | 1.27 (1.16 - 1.39)           | 1.25 (1.14 - 1.35)               | <.001   |
| Depressed at postnatal assessment only                          | 262                | 1710                 | 16.8         | 1.55 (1.31 - 1.79)           | 1.54 (1.29 - 1.78)               | <.001   |
| Depressed at both assessment points                             | 138                | 949                  | 14.9         | 1.41 (1.09 - 1.72)           | 1.39 (1.08 - 1.69)               | 0.002   |
| <b>¶Diarrhoea within past 24 hours</b>                          |                    |                      |              |                              |                                  |         |
| Not depressed at either assessment point                        | 6282               | 25799                | 5.9          | 1                            | 1                                |         |
| Depressed at antenatal assessment only                          | 646                | 2862                 | 8.3          | 1.53 (1.23 - 1.82)           | 1.41 (1.14 - 1.67)               | 0.001   |
| Depressed at postnatal assessment only                          | 161                | 633                  | 12.8         | 2.55 (1.69 - 3.40)           | 2.14 (1.44 - 2.84)               | <.001   |
| Depressed at both assessment points                             | 86                 | 389                  | 14.7         | 2.89 (1.68 - 4.09)           | 2.34 (1.39 - 3.29)               | 0.001   |
| <b>Vomiting within past 24 hours</b>                            |                    |                      |              |                              |                                  |         |
| Not depressed at either assessment point                        | 5510               | 5510                 | 4.2          | 1                            | 1                                |         |
| Depressed at antenatal assessment only                          | 544                | 544                  | 8.1          | 1.92 (1.33 - 2.52)           | 1.71 (1.15 - 2.26)               | 0.001   |
| Depressed at postnatal assessment only                          | 127                | 127                  | 11.0         | 2.62 (1.28 - 3.95)           | 2.51 (1.19 - 3.83)               | 0.001   |
| Depressed at both assessment points                             | 72                 | 72                   | 9.7          | 2.31 (0.66 - 3.96)           | 1.97 (0.53 - 3.41)               | 0.001   |
| <b>Fever within past 24 hours</b>                               |                    |                      |              |                              |                                  |         |
| Not depressed at either assessment point                        | 5510               | 5510                 | 8.9          | 1                            | 1                                |         |
| Depressed at antenatal assessment only                          | 544                | 544                  | 13.9         | 1.58 (1.16 - 2.00)           | 1.45 (1.10 - 1.79)               | 0.001   |
| Depressed at postnatal assessment only                          | 127                | 127                  | 19.7         | 2.26 (1.23 - 3.29)           | 1.96 (1.20 - 2.72)               | 0.001   |
| Depressed at both assessment points                             | 72                 | 72                   | 11.1         | 1.25 (0.40 - 2.10)           | 1.13 (0.39 - 1.87)               | 0.001   |
| <b>¶Cough within past 24 hours</b>                              |                    |                      |              |                              |                                  |         |
| Not depressed at either assessment point                        | 6282               | 25799                | 13.6         | 1                            | 1                                |         |
| Depressed at antenatal assessment only                          | 646                | 2862                 | 18.9         | 1.48 (1.28 - 1.68)           | 1.40 (1.23 - 1.58)               | <.001   |
| Depressed at postnatal assessment only                          | 161                | 633                  | 20.9         | 1.71 (1.27 - 2.14)           | 1.57 (1.19 - 1.94)               | 0.001   |
| Depressed at both assessment points                             | 86                 | 389                  | 22.6         | 1.93 (1.33 - 2.53)           | 1.71 (1.21 - 2.22)               | 0.001   |
| <b>¶Persistent crying within past 24 hours</b>                  |                    |                      |              |                              |                                  |         |
| Not depressed at either assessment point                        | 5510               | 5510                 | 3.3          | 1                            | 1                                |         |
| Depressed at antenatal assessment only                          | 544                | 544                  | 4.8          | 1.45 (0.87 - 2.04)           | 1.35 (0.80 - 1.90)               | 0.001   |
| Depressed at postnatal assessment only                          | 127                | 127                  | 10.2         | 3.12 (1.45 - 4.78)           | 2.85 (1.27 - 4.42)               | 0.001   |
| Depressed at both assessment points                             | 72                 | 72                   | 8.3          | 2.54 (0.56 - 4.51)           | 2.35 (0.47 - 4.23)               | 0.001   |

\*Number of infants who survived till postnatal depression assessment and whose mothers were assessed also at pregnancy

---

¶Based on approximately two month's worth of data.

†Following postnatal depression assessment, at which the infant morbidity outcome was reported as having occurred in the previous 24 hours up to 12 months.

‡ adjusted for: mother's age, education, marital status, wealth quintile, ethnicity, religion, area of residence, parity, early parturition, mode of delivery, perceived size of baby, sex of baby.

---

## **Online Table 1.2: Association Between probable Antenatal and/or Postnatal depression and Infant Morbidity**
